# Supplementary material
Source: PubMed Central journal article supplement (PMC8826488)
Supplement: NIHMS1770525-supplement-2.pdf [file NIHMS1770525-supplement-2.pdf]

## ■ ASSOCIATED CONTENT

### SI Supporting Information

The Supporting Information is available free of charge at <https://pubs.acs.org/doi/10.1021/acs.jpcc.1c09048>.

Supporting methods, gel electrophoresis and DNA sequence information, experimental spectra decomposition, supplementary absorbance, circular dichroism, and fluorescence spectra (PDF)
